# Supplementary material for: Genome-wide Transcriptional Profiling of Appressorium Development by the Rice Blast Fungus Magnaporthe oryzae
Source: PLoS Pathog. 2012 Feb 9;8(2):e1002514. doi: 10.1371/journal.ppat.1002514 (PMC3276559; doi:10.1371/journal.ppat.1002514)
Supplement: Table S11 — HT-SuperSAGE data showing differential expression of M. oryzae genes encoding organic acid transporters during appressorium morphogenesis. (XLS) [file ppat.1002514.s012.xls]

## Sheet: organic_acid_transporter_compar
Table S11 - HT-SuperSAGE data for genes encoding organic acid transporters
Gene id	Broad Institute Annotation	blast2go	pfam	padj_MM_CM	padj_T4_P4	padjT4_CM	padjT6_CM	padjT8_CM	padjT14_CM	padjT16_CM	baseMeanCM	baseMeanMM	baseMeanP4	baseMeanT4	baseMeanT6	baseMeanT8	baseMeanT14	baseMeanT16
MGG_08827	vacuolar amino acid transporter 1 (689 aa)	vacuolar amino acid transporter 1	Transmembrane amino acid transporter protein (PF01490) 327->680	0.382334	0.845113	0.154795	0.154584	0.461775	0.681007	1	8.92561	3.0036	18.3405	24.9654	24.7329	17.6589	6.59186	9.20374
MGG_02899	proline-specific permease (561 aa)	proline-specific permease	Amino acid permease (PF00324) 59->521	0.886745	0.778997	0.05955	0.0492943	0.00186718	4.68186e-05	0.00131906	67.0054	45.4592	240.61	170.083	178.196	265.823	377.527	283.014
MGG_00289	amino-acid permease inda1 (578 aa)	amino-acid permease inda1	Amino acid permease (PF00324) 70->534	0.665494	0.590264	2.335e-09	1.504e-09	2.62439e-09	7.57596e-10	7.67628e-10	436.646	260.865	7445.15	13650.8	14692	13057.6	12636.1	12773.7
MGG_01385	choline transport protein (544 aa)	amino acid	Amino acid permease (PF00324) 71->530	1	0.395973	0.115758	0.115322	0.283018	0.470582	0.861973	549.619	495.561	113.806	240.75	232.337	354.951	393.385	533.418
MGG_02072	amino-acid permease inda1 (578 aa)	amino-acid permease inda1	Amino acid permease (PF00324) 73->535	0.000139459	0.148489	3.42713e-05	0.000127216	8.93857e-06	0.0452498	0.646616	437.239	3211.8	123.874	41.6227	35.8534	39.519	182.269	307.041
MGG_02328	low-affinity methionine permease (562 aa)	methionine	Amino acid permease (PF00324) 77->528	9999	0.742305	0.64502	0.690661	0.354955	0.613818	0.823621	0	0	0	1.20838	0.597215	2.38377	1.3889	0.771783
MGG_03103	high-affinity methionine permease (531 aa)	high affinity methionine permease	Amino acid permease (PF00324) 52->471	0.245404	0.592225	0.371032	0.75155	0.169177	0.475042	0.286359	5.2965	19.2897	6.60164	12.0392	8.40218	14.6851	10.4791	12.8231
MGG_03861	high-affinity methionine permease (572 aa)	high affinity methionine permease	Amino acid permease (PF00324) 66->514	0.994978	0.89223	0.416806	0.648313	0.958638	1	0.958712	2.9752	2.40223	2.27808	1.41591	5.50878	2.46876	3.3583	3.8811
MGG_04043	asc-type amino acid transporter 1 (618 aa)	amino acid	Amino acid permease (PF00324) 134->451	1	1	0.136091	0.282317	0.52781	0.523753	0.829053	2.23634	1.26811	9.50695	7.8606	6.70321	3.58751	4.7472	3.39319
MGG_04216	proline-specific permease (551 aa)	amino acid	Amino acid permease (PF00324) 68->528	0.641159	0.205285	6.44259e-05	0.0140013	0.000157447	0.0040429	0.00253576	20.297	10.7463	5.27661	0.874764	2.70805	1.39251	3.76249	3.08713
MGG_05107	general amino acid permease AGP3 (548 aa)	general amino acid permease agp3	Amino acid permease (PF00324) 62->505	0.576644	0.348153	0.334854	0.415778	1	0.299138	0.297664	26.4173	14.5506	21.5255	52.2091	48.7965	31.0552	15.6305	16.0123
MGG_05128	dicarboxylic amino acid permease (550 aa)	amino acid transporter	Amino acid permease (PF00324) 46->507	0.367124	1	0.262474	0.692112	0.700183	0.338779	0.408387	62.3628	26.3656	104.232	113.284	78.6984	51.7067	37.5434	36.225
MGG_06036	proline-specific permease (556 aa)	general amino acid permease	Amino acid permease (PF00324) 58->523	1	0.61841	0.734548	0.92493	0.1462	0.405619	0.570716	7.44789	6.87656	2.92883	5.72056	6.38401	18.8626	12.9043	11.8251
MGG_06616	high-affinity methionine permease (611 aa)	high affinity methionine permease	Amino acid permease (PF00324) 73->518	1	0.261351	0.0310895	0.0588875	0.152962	0.00332772	0.00229922	10.0438	12.6158	0	2.2215	1.79164	3.18626	0.80839	0.771783
MGG_07485	dicarboxylic amino acid permease (555 aa)	dicarboxylic amino acid permease	Amino acid permease (PF00324) 50->513	0.563381	0.82821	1	0.934263	0.772089	1	0.82302	7.74226	16.4855	4.69555	7.06729	8.49485	5.52754	6.54029	8.91987
MGG_07606	general amino-acid permease GAP1 (531 aa)	dicarboxylic amino acid permease	Amino acid permease (PF00324) 57->515	0.329048	0.89327	0.101349	0.383992	0.181351	0.589573	0.270773	8.65101	2.53623	1.46442	2.62429	4.1805	3.77628	5.60716	4.16497
MGG_08129	lysine-specific permease (523 aa)	arginine	Amino acid permease (PF00324) 44->509	1	0.662316	0.00339742	0.00606431	8.35792e-05	0.00102699	0.0013039	23.1418	18.6916	0.953048	2.62429	1.79164	0.717502	2.95411	3.10931
MGG_08548	proline-specific permease (588 aa)	amino acid	Amino acid permease (PF00324) 84->551	0.884522	1	1	9999	9999	9999	1	0	0.467371	0.441678	0.471972	0	0	0	0.487909
MGG_08670	choline transport protein (513 aa)	choline transporter	Amino acid permease (PF00324) 57->507	0.994978	0.868566	1	0.373652	1	0.837969	0.900428	0.928516	0	1.9061	0.874764	3.71714	1.35001	0.404195	1.7476
MGG_09049	predicted protein (198 aa)	choline transport	Amino acid permease (PF00324) 9->155	0.00751995	0.778997	0.439211	1	0.922474	0.74531	0.739177	2.426	18.2242	0	0.471972	1.69897	1.39251	0.984702	0.873801
MGG_11062	general amino-acid permease GAP1 (636 aa)	general amino-acid permease gap1	Amino acid permease (PF00324) 130->593	0.612776	0.921622	0.185248	0.54811	0.0884029	0.489395	0.616698	7.44789	3.0036	3.95157	2.62429	4.1805	2.38377	3.81407	5.03877
MGG_11327	amino-acid permease inda1 (541 aa)	amino acid permease	Amino acid permease (PF00324) 43->499	0.884522	0.183029	0.176442	0.776314	0.911516	1.31263e-05	8.46903e-05	41.483	58.4051	6.29935	20.7991	35.9461	51.1216	303.864	256.232
MGG_11611	conserved hypothetical protein (531 aa)	solute carrier family 7 protein	Amino acid permease (PF00324) 92->523	0.948788	0.149387	0.000103183	0.000279476	4.19393e-05	0.277993	0.0892058	394.762	255.492	694.028	2394.06	2202.48	2406.28	627.713	848.714
MGG_12676	predicted protein (383 aa)	hypothetical protein MGCH7_ch7g227 [Magnaporthe oryzae 70-15]		0.597463	0.951002	6.45386e-05	0.00972881	6.79014e-05	6.39415e-05	2.57598e-06	22.6578	42.5145	1.39473	0.943943	2.29619	1.35001	1.21258	0.385892
MGG_12861	high-affinity methionine permease (534 aa)	low-affinity methionine permease	Amino acid permease (PF00324) 66->460	0.884522	0.85004	0.615146	0.519705	0.46944	0.813699	0.872325	8.56607	4.87308	7.69407	5.5822	4.4997	5.48504	6.41555	7.86421
MGG_13334	general amino acid permease AGP2 (577 aa)	histidine permease	Amino acid permease (PF00324) 54->517	9999	9999	9999	0.385161	1	0.615704	0.116051	0	0	0	0	1.79164	0.675007	1.56521	2.31535
MGG_13659	dicarboxylic amino acid permease (563 aa)	dicarboxylic amino acid permease	Amino acid permease (PF00324) 89->485	1	0.914934	0.623167	1	0.872309	0.127074	0.107579	11.646	11.547	14.226	17.6336	11.3883	10.0638	25.2796	26.8971
MGG_13798	predicted protein (305 aa)	histidine permease	Amino acid permease (PF00324) 2->81, Amino acid permease (PF00324) 86->282	0.892774	0.0604355	0.130579	0.811387	0.98196	0.574645	0.788102	12.8491	18.355	6.39257	33.8882	16.619	12.7638	9.56756	16.0921
MGG_14115	GabA permease (548 aa)	polyamine transporter tpo5	Amino acid permease (PF00324) 58->501	0.00389896	1	0.00194644	0.0554665	0.00185526	0.0244713	7.53186e-05	27.7251	155.573	4.90462	4.37382	7.52695	4.53628	9.61913	3.10931
MGG_14862	predicted protein (124 aa)	amino acid		0.924453	1	4.47864e-06	0.000242393	2.17556e-07	5.63532e-08	2.58981e-08	23.0628	18.623	0.511369	0.402793	0.597215	0	0	0
MGG_14937	proline-specific permease (562 aa)	lysine-specific permease	Amino acid permease (PF00324) 49->511	0.179404	0.22542	5.72728e-05	2.99927e-05	1.90222e-05	0.0109404	0.141351	247.918	713.053	76.338	30.1002	18.9564	29.9177	87.8364	124.142
MGG_15020	choline transport protein (527 aa)	amino acid permease family	Amino acid permease (PF00324) 33->475	1	0.897718	0.912332	0.823173	0.697541	0.702028	0.820392	1.58243	3.20297	0	0.874764	2.61538	0.675007	0.404195	2.90528
MGG_03399	arsenite resistance protein arsB (390 aa)	arsenite efflux transporter	Sodium Bile acid symporter family (PF01758) 96->291	0.999774	0.685138	0.421157	0.532097	1	0.831252	0.953584	3.62912	2.20286	13.273	8.41403	6.74439	3.86127	2.3736	2.90528
MGG_14690	sodium bile acid symporter family protein (385 aa)	sodium bile acid transporter family	Sodium Bile acid symporter family (PF01758) 66->206	0.570478	0.121721	0.931868	0.0786647	0.0628949	0.169218	0.112564	30.2558	56.2023	94.4676	28.2569	79.1513	78.5517	62.8746	72.4102
MGG_04248	conserved hypothetical protein (741 aa)	oligopeptide transporter	OPT oligopeptide transporter protein (PF03169) 65->719	0.354866	0.742305	0.64502	0.385161	1	0.108138	0.618065	0	2.20286	0	1.41591	1.69897	0.675007	2.77779	1.36171
MGG_05525	conserved hypothetical protein (513 aa)	upf0187 domain membrane protein	Bestrophin (PF01062) 83->410	0.498371	0.303248	0.062486	1	0.683555	0.572579	0.642749	273.421	489.959	294.561	725.843	277.972	375.571	199.068	217.554
MGG_07639	excitatory amino acid transporter 2 (486 aa)	excitatory amino acid transporter	Sodium:dicarboxylate symporter family (PF00375) 47->448	0.876824	0.913671	0.0186803	0.0106109	0.00688948	0.0303068	0.000473883	17.7011	28.6306	2.41747	3.49906	1.79164	2.46876	5.45244	1.95164
MGG_04997	sexual differentiation process protein isp4 (786 aa)	small oligopeptide opt family	OPT oligopeptide transporter protein (PF03169) 93->760	0.884522	0.273905	6.94563e-08	3.67782e-05	1.58504e-06	1.09734e-07	1.71682e-06	125.456	108.388	1.02274	4.91497	9.9673	12.6364	10.1265	12.801
		significantly up-regulated (1st v 2nd, padj <=0.05)
		significantly down-regulated (1st v 2nd, padj <=0.05)
	Key
	padj = P-value (adjusted for false discovery rate) showing probability that differences in counts between two conditions are due to real differences in transcript abundance.
	baseMean = weighted average of counts from two biological replicates
	MM = mycelium grown in glucose minimal medium
	CM = mycelium grown in complete medium
	T4-T16 = time-points during appressorium development of wild-type strain Guy11
	P4 = 4 hours after conidial germination in pmk1 mutant.
